# Supplementary material for: Vaccine effectiveness against SARS-CoV-2 transmission to household contacts during dominance of Delta variant (B.1.617.2), the Netherlands, August to September 2021
Source: PubMed Central journal article supplement (PMC8569927; doi:10.2807/1560-7917.es.2021.26.44.2100977), 2021-11-04
Supplement: 21-00977_deGIER_Supplement.pdf [file 21-00977_deGIER_Supplement.pdf]

### Supplementary tables

This supplementary material is hosted by *Eurosurveillance* as supporting information alongside the article *Vaccine effectiveness against SARS-CoV-2 transmission to household contacts during dominance of Delta variant (B.1.617.2), August-September 2021, the Netherlands* on behalf of the authors who remain responsible for the accuracy and appropriateness of the content. The same standards for ethics, copyright, attributions and permissions as for the article apply. Supplements are not edited by Eurosurveillance and the journal is not responsible for the maintenance of any links or email addresses provided therein.

Table S1. Secondary attack rates (SAR) for unvaccinated and fully vaccinated index cases, by age group of the index case.

| Age group index                     | Unvaccinated index - SAR |       |            | Fully vaccinated index - SAR |       |            |
|-------------------------------------|--------------------------|-------|------------|------------------------------|-------|------------|
|                                     | positive                 | total | percentage | positive                     | total | percentage |
| Unvaccinated household contacts     |                          |       |            |                              |       |            |
| All ages                            | 547                      | 2517  | 22         | 38                           | 303   | 13         |
| 12-17                               | 139                      | 967   | 14         | 2                            | 7     | 29         |
| 18-29                               | 140                      | 719   | 19         | 6                            | 57    | 11         |
| 30-49                               | 187                      | 618   | 30         | 15                           | 158   | 9          |
| 50-74                               | 76                       | 202   | 38         | 12                           | 77    | 16         |
| 75+                                 | 5                        | 11    | 45         | 3                            | 4     | 75         |
| Fully vaccinated household contacts |                          |       |            |                              |       |            |
| All ages                            | 164                      | 1505  | 11         | 256                          | 2070  | 12         |
| 12-17                               | 88                       | 851   | 10         | 2                            | 86    | 2          |
| 18-29                               | 37                       | 483   | 8          | 46                           | 838   | 5          |
| 30-49                               | 31                       | 135   | 23         | 45                           | 388   | 12         |
| 50-74                               | 6                        | 33    | 18         | 141                          | 680   | 21         |
| 75+                                 | 2                        | 3     | 67         | 22                           | 78    | 28         |

Table S2. Secondary attack rate (SAR) of SARS-CoV-2 and vaccine effectiveness against transmission (VET) adjusted for time since full vaccination of the contact (< or >= 60 days, only in analysis of fully vaccinated contacts), age group of the index case and contact and week of notification date of the index case, stratified by time since full vaccination of the index case.

| Analysis                            | Unvaccinated index - SAR |       |            | Index fully vaccinated < 60 days ago - SAR |       |            | Index fully vaccinated < 60 days ago - adjusted VET (%) (95% CI) | Index fully vaccinated >= 60 days ago - SAR |       |            | Index fully vaccinated >= 60 days ago - adjusted VET (%) (95% CI) |
|-------------------------------------|--------------------------|-------|------------|--------------------------------------------|-------|------------|------------------------------------------------------------------|---------------------------------------------|-------|------------|-------------------------------------------------------------------|
|                                     | positive                 | total | percentage | positive                                   | total | percentage |                                                                  | positive                                    | total | percentage |                                                                   |
| Unvaccinated household contacts     | 547                      | 2517  | 22         | 24                                         | 209   | 11         | 67 (47 to 79)                                                    | 14                                          | 94    | 15         | 55 (19 to 76)                                                     |
| Fully vaccinated household contacts | 164                      | 1505  | 11         | 99                                         | 1278  | 8          | 57 (40 to 69)                                                    | 157                                         | 792   | 20         | 28 (-4 to 50)                                                     |
